# Supplementary material
Source: PubMed Central journal article supplement (PMC4772522)
Supplement: 000590.pdf [file 000590.pdf]

**Description of *Mycobacterium saopaulense* sp. nov., a rapidly growing  
mycobacterium closely related with members of the *Mycobacterium chelonae*-*M.*  
*abscessus* group.**

Christiane Lourenço Nogueira<sup>1</sup>, Christopher M. Whipps<sup>2</sup>, Cristianne Kayoko Matsumoto<sup>1</sup>, Erica Chimara<sup>3</sup>, Sara Droz<sup>4</sup>, Enrico Tortoli<sup>5</sup>, Denise de Freitas<sup>6</sup>, Margo Cnockaert<sup>7</sup>, Juan Carlos Palomino<sup>7</sup>, Anandi Martin<sup>7</sup>, Peter Vandamme<sup>7</sup>, Sylvia Cardoso Leão<sup>1+</sup>

International Journal of Systematic and Evolutionary Microbiology

<sup>1</sup> Departamento de Microbiologia, Imunologia e Parasitologia, Escola Paulista de Medicina, Universidade Federal de São Paulo, São Paulo, SP, Brazil

<sup>2</sup> SUNY-ESF, State University of New York College of Environmental Science and Forestry, Environmental and Forest Biology, 1 Forestry Drive, Syracuse, NY, USA

<sup>3</sup> Núcleo de Tuberculose e Micobacterioses, Instituto Adolfo Lutz, São Paulo, SP, Brazil

<sup>4</sup> Division of Bacteriology, University of Bern, Switzerland

<sup>5</sup> Emerging Bacterial Pathogens Unit, San Raffaele Scientific Institute, Milan, Italy

<sup>6</sup> Departamento de Oftalmologia, Escola Paulista de Medicina, Universidade Federal de São Paulo, São Paulo, SP, Brazil

<sup>7</sup> Ghent University, Laboratory of Microbiology, Faculty of Sciences, Ghent, Belgium

<sup>+</sup> Corresponding author:

Sylvia Cardoso Leão

email: [sylvia.leao@gmail.com](mailto:sylvia.leao@gmail.com)

**Table S1:** Comparison of phenotypic and biochemical characteristics of the isolates and the type strains included in this study.

Isolates/strains: 1, EPM10906; 2, EPM10695; 3, IAL 3785; 4, JAN1; 5, JAN2, 6, *M. abscessus subsp. abscessus* ATCC 19977<sup>T</sup>; 7, *M. abscessus subsp. bolletii* CCUG 50184<sup>T</sup>; 8, *M. chelonae* ATCC 35752<sup>T</sup>; 9, *M. immunogenum* ATCC 700505<sup>T</sup>; 10, *M. salmoniphilum* ATCC 13758<sup>T</sup>; 11, *M. franklinii* DSM 45524<sup>T</sup>

| Characteristics                      | 1  | 2  | 3  | 4  | 5  | 6  | 7  | 8  | 9  | 10 | 11 |
|--------------------------------------|----|----|----|----|----|----|----|----|----|----|----|
| Colony morphology                    | SM | RG | SM | SM |
| Pigmentation                         | nc |
| Growth in the presence of:           |    |    |    |    |    |    |    |    |    |    |    |
| Picric acid                          | +  | +  | +  | +  | +  | +  | +  | +  | +  | +  | +  |
| PNB*                                 | +  | +  | +  | +  | +  | +  | +  | +  | +  | +  | +  |
| Nitrite                              | +  | +  | +  | +  | +  | +  | +  | +  | +  | +  | +  |
| 5% NaCl                              | +  | +  | +  | +  | +  | +  | +  | +  | +  | +  | +  |
| Nitrate reduction                    | -  | -  | -  | -  | -  | -  | -  | -  | -  | -  | -  |
| Tween 80 hydrolysis                  | -  | -  | -  | -  | -  | -  | -  | -  | -  | -  | -  |
| single-source carbon utilization of: |    |    |    |    |    |    |    |    |    |    |    |
| mannitol                             | -  | -  | -  | -  | -  | -  | -  | -  | +  | -  | -  |
| inositol                             | -  | -  | -  | -  | -  | -  | -  | -  | -  | -  | -  |
| citrate                              | +  | +  | +  | +  | +  | -  | -  | +  | +  | -  | -  |

\*PNB, *p*-aminobenzoic acid; SM, smooth; RG, rough; nc, nonchromogenic

**Table S2.** Primers used in genotypic characterization of strains and isolates included in this study

| Gene         | Primers    | Sequence 5'-3'         | References                       |
|--------------|------------|------------------------|----------------------------------|
| 16S rRNA     | 16S-27F*#  | AGAGTTTGATCCTGGCTCAG   | (Harmsen <i>et al.</i> , 2003)   |
| 16S rRNA     | 800F*      | ATTAGATACCCTGGTAG      | (Adékambi & Drancourt, 2004)     |
| 16S rRNA     | 16S-907R*# | CCGTCAATTCCTTTGAGTTT   | (Harmsen <i>et al.</i> , 2003)   |
| 16S rRNA     | 16R-1492*# | TACGGCTACCTTGTTACGACTT | (Gomila <i>et al.</i> , 2007)    |
| 23S rRNA     | 23S1R*     | CCCAAAGCCTATATATTCAGC  | (Matsumoto <i>et al.</i> , 2012) |
| <i>rpoB</i>  | MYCOF1*    | TCCGATGAGGTGCTGGCAGA   | (Macheras <i>et al.</i> , 2011)  |
| <i>rpoB</i>  | MYCOR2*    | ACTTGATGGTCAACAGCTCC   | (Macheras <i>et al.</i> , 2011)  |
| <i>hsp65</i> | Tb11       | ACCAACGATGGTGTGTCCAT   | (Telenti <i>et al.</i> , 1993)   |
| <i>hsp65</i> | Tb12       | CTTGTCGAACCGCATAACCCT  | (Telenti <i>et al.</i> , 1993)   |
| <i>hsp65</i> | hsp667F*   | GGCCAAGACAATTGCGTACG   | (Selvaraju <i>et al.</i> , 2005) |
| <i>hsp65</i> | hsp667R*   | GGAGCTGACCAGCAGGATG    | (Selvaraju <i>et al.</i> , 2005) |
| ITS          | Sp1*       | ACCTCCTTTCTAAGGAGCACC  | (Roth <i>et al.</i> , 2000)      |
| ITS          | Sp2        | GATGCTCGCAACCACTATCCA  | (Roth <i>et al.</i> , 2000)      |
| ITS          | 23S1R*     | CCCAAAGCCTATATATTCAGC  | (Matsumoto <i>et al.</i> , 2012) |

\*Primers used for PCR amplification and sequencing of 16S rRNA, *hsp65*, *rpoB* and ITS

# Primers were modified based on *M. abscessus* subsp. *abscessus* ATCC 19977 genome

**Table S3.** Species, strains and GenBank accession numbers of sequences used for phylogenetic analyses. Number of characters in each DNA sequence alignment shown in final row.

| <i>Mycobacterium</i> species                | Strain                  | 16S rRNA | <i>hsp65</i> | <i>rpoB</i> |
|---------------------------------------------|-------------------------|----------|--------------|-------------|
| <i>M. abscessus</i> subsp. <i>abscessus</i> | CIP 104536 <sup>T</sup> | AY457071 | AY458075     | AY147164    |
| <i>M. abscessus</i> subsp. <i>boletti</i>   | CIP 108541 <sup>T</sup> | AY859681 | AY859675     | AY859692    |
| <i>M. aubagnense</i>                        | CIP 108543 <sup>T</sup> | AY859683 | AY859677     | AY859694    |
| <i>M. chelonae</i>                          | CIP104535 <sup>T</sup>  | AY457072 | AY458074     | AY147163    |
| <i>M. fortuitum</i>                         | CIP 104534 <sup>T</sup> | AY457066 | AY458072     | AY147165    |
| <i>M. franklinii</i>                        | DSM 45524 <sup>T</sup>  | HQ153090 | KM392059     | HQ153091    |
| <i>M. immunogenum</i>                       | CIP 106684 <sup>T</sup> | AY457080 | AY458081     | AY262739    |
| <i>M. mucogenicum</i>                       | ATCC 49650 <sup>T</sup> | AY457074 | AY458079     | AY147170    |
| <i>M. phocaicum</i>                         | CIP 108542 <sup>T</sup> | AY859682 | AY859676     | AY859693    |
| <i>M. salmoniphilum</i>                     | ATCC 13758 <sup>T</sup> | DQ866768 | DQ866777     | DQ866790    |
| <i>M. saopaulense</i>                       | JAN1                    | DQ866774 | DQ866786     | DQ866800    |
| <i>M. saopaulense</i>                       | JAN2                    | DQ866775 | DQ866787     | DQ866801    |
| <i>M. saopaulense</i>                       | EPM 10695               | KM973036 | KM973025     | KM973028    |
| <i>M. saopaulense</i>                       | EPM 10906 <sup>T</sup>  | KM973037 | KM973026     | KM973029    |
| <i>M. saopaulense</i>                       | IAL 3785                | KM973038 | KM973027     | KM973030    |
| Characters in alignment                     |                         | 1387     | 401          | 676         |

**Figure S1.** Estimate of phylogeny of *Mycobacterium* species based on small subunit (16S) ribosomal DNA sequences. Names and strains are shown, with Genbank accession numbers in parentheses. A superscript ‘T’ represents sequences from type species. Bootstrap values greater than 50% are shown at nodes. The *M. chelonae*-*M. abscessus* group has 100% bootstrap support and is shown in a grey box. Within the group, most relationships are unresolved using 16S, and species are intermixed with the exception of *M. immunogenum* and *M. salmoniphilum*.

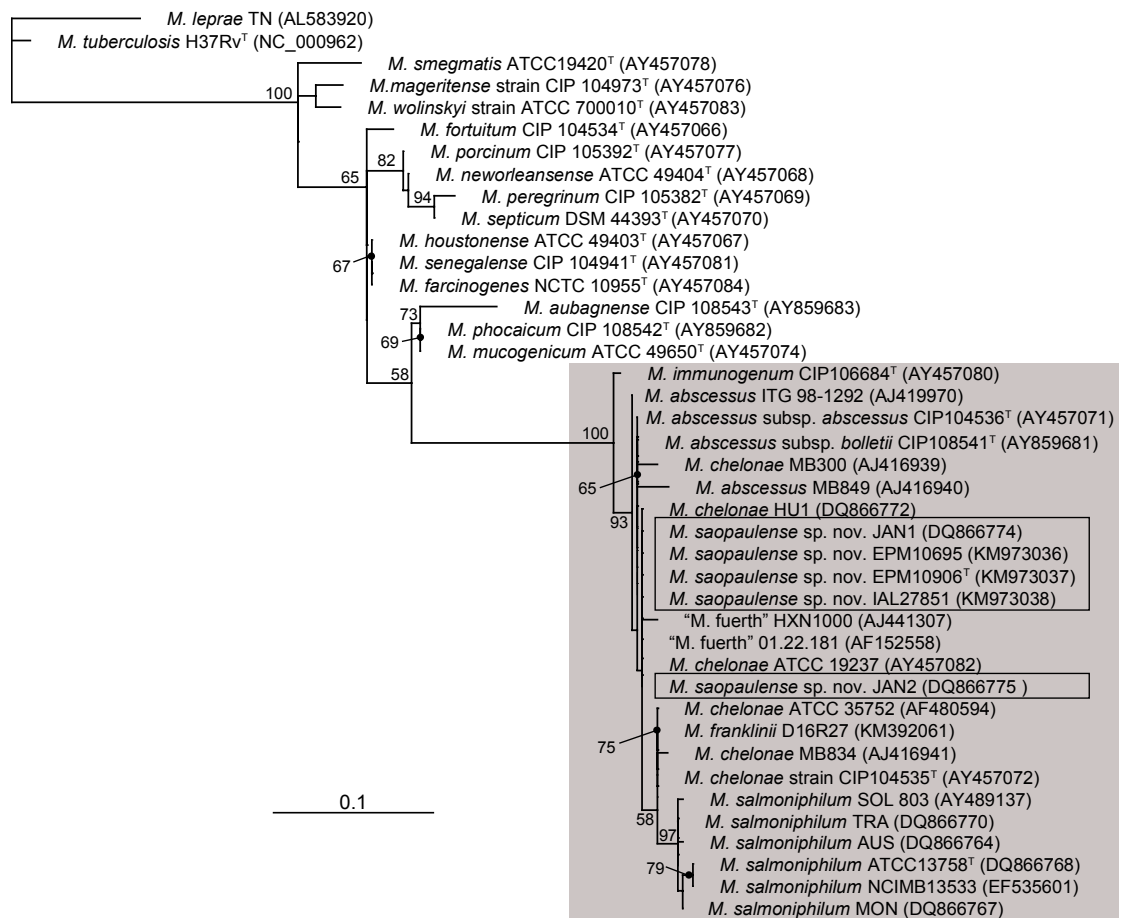

## References

- Adékambi, T. & Drancourt, M. (2004).** Dissection of phylogenetic relationships among 19 rapidly growing *Mycobacterium* species by 16S rRNA, *hsp65*, *sodA*, *recA* and *rpoB* gene sequencing. *Int J Syst Evol Microbiol* **54**, 2095-2105.
- Gomila, M., Ramirez, A. & Lalucat, J. (2007).** Diversity of environmental mycobacterium isolates from hemodialysis water as shown by a multigene sequencing approach. *Appl Environ Microbiol* **73**, 3787-3797.
- Harmsen, D., Dostal, S., Roth, A., Niemann, S., Rothganger, J., Sammeth, M., Albert, J., Frosch, M. & Richter, E. (2003).** RIDOM: comprehensive and public sequence database for identification of *Mycobacterium* species. *BMC Infect Dis* **3**, 26.
- Macheras, E., Roux, A. L., Bastian, S., Leao, S. C., Palaci, M., Sivadon-Tardy, V., Gutierrez, C., Richter, E., Rusch-Gerdes, S. & other authors (2011).** Multilocus sequence analysis and *rpoB* sequencing of *Mycobacterium abscessus* (*sensu lato*) strains. *J Clin Microbiol* **49**, 491-499.
- Matsumoto, C. K., Chimara, E., Ramos, J. P., Campos, C. E., Caldas, P. C., Lima, K. V., Lopes, M. L., Duarte, R. S. & Leao, S. C. (2012).** Rapid tests for the detection of the *Mycobacterium abscessus* subsp. *bolletii* strain responsible for an epidemic of surgical-site infections in Brazil. *Mem. Instit Oswaldo Cruz* **107**, 969-977.
- Roth, A., Reischl, U., Streubel, A., Naumann, L., Kroppenstedt, R. M., Habicht, M., Fischer, M. & Mauch, H. (2000).** Novel diagnostic algorithm for identification of mycobacteria using genus-specific amplification of the 16S-23S rRNA gene spacer and restriction endonucleases. *J Clin Microbiol* **38**, 1094-1104.
- Selvaraju, S. B., Khan, I. U. & Yadav, J. S. (2005).** A new method for species identification and differentiation of *Mycobacterium chelonae* complex based on amplified *hsp65* restriction analysis (AHSPRA). *Mol Cell Probes* **19**, 93-99.
- Telenti, A., Marchesi, F., Balz, M., Bally, F., Bottger, E. C. & Bodmer, T. (1993).** Rapid identification of mycobacteria to the species level by polymerase chain reaction and restriction enzyme analysis. *J Clin Microbiol* **31**, 175-178.
